# Supplementary material
Source: MDPI journal article supplement (https://www.mdpi.com/2073-4395/14/2/389)
Supplement: s1 [file s1]

## Supplementary Material

### Lupine Cultivation Affects Soil's P Availability and Nutrient Uptake in Four Contrasting Soils

**Table S1.** Initial soil properties before the establishment of the experiment.

| Site (soil type†)           | PBray1              | NH <sub>4</sub> <sup>+</sup> -N | NO <sub>3</sub> <sup>-</sup> -N | Ca <sup>2+</sup>       | Mg <sup>2+</sup> | K <sup>+</sup> | Na <sup>+</sup> | Al <sup>3+</sup> exch. | pH   |
|-----------------------------|---------------------|---------------------------------|---------------------------------|------------------------|------------------|----------------|-----------------|------------------------|------|
|                             | mg kg <sup>-1</sup> |                                 |                                 | cmolc kg <sup>-1</sup> |                  |                |                 |                        |      |
| Site 1 (Pachic Argiudoll)   | 12.0                | 16.4                            | 21.9                            | 14.5                   | 3.0              | 1.0            | 0.2             | 0.05                   | 5.17 |
| Site 2 (Typic Dystruptepts) | 15.6                | 25.7                            | 0.3                             | 4.6                    | 1.2              | 0.3            | 0.1             | 0.05                   | 5.32 |
| Site 3 (Typic Argiudoll)    | 10.3                | 7.8                             | 0.9                             | 17.7                   | 2.8              | 1.4            | 0.2             | 0.02                   | 6.00 |
| Site 4 (Typic Hapludults)   | 5.8                 | 10.9                            | 12.1                            | 1.4                    | 0.5              | 0.1            | 0.1             | 0.16                   | 4.50 |

†USDA source: Keys to soil taxonomy. Soil Conservation Service, 2014.

<https://www.nrcs.usda.gov/resources/guides-and-instructions/keys-to-soil-taxonomy>

**Table S2.** ANOVA for soil PBray1 concentration at 87 days after planting.

| Factor                            | gl | Valor de F | P > F†             |
|-----------------------------------|----|------------|--------------------|
| Especie                           | 2  | 17,77      | <b>&lt; 0.0001</b> |
| C1: Lupino vs. avena              | 1  |            | <b>&lt; 0.0001</b> |
| C2: L. albus vs. L. angustifolius | 1  |            | 0.0556             |
| Tipo de suelo                     | 3  | 46,40      | <b>&lt; 0.0001</b> |
| Tipo de suelo x Especie           | 6  | 1,32       | 0.2721             |

† Significant effects (p < 0.05) are in bold.

Note: For this model species and soil type were considered as fixed factors.

**Table S3.** ANOVA for soil PBray1 concentration at 103 days after planting.

| Treatment effect                          | DF | F Value | Pr > F†           |
|-------------------------------------------|----|---------|-------------------|
| Species                                   | 2  | 23.40   | <b>&lt;0.0001</b> |
| Soil type                                 | 3  | 60.09   | <b>&lt;0.0001</b> |
| Species x Soil type                       | 6  | 3.81    | <b>0.0048</b>     |
| C1: Lupine vs. Oat in Site 1              | 1  |         | <b>0.0008</b>     |
| C1: Lupine vs. Oat in Site 2              | 1  |         | <b>0.0002</b>     |
| C1: Lupine vs. Oat in Site 3              |    |         | <b>0.0340</b>     |
| C1: Lupine vs. Oat in Site 4              | 1  |         | <b>0.0009</b>     |
| C2: L. albus vs L.angustifolius in Site 1 | 1  |         | <b>0.0039</b>     |
| C2: L. albus vs L.angustifolius in Site 2 | 1  |         | <b>0.0290</b>     |
| C2: L. albus vs L.angustifolius in Site 3 | 1  |         | <b>0.0301</b>     |
| C2: L. albus vs L.angustifolius in Site 4 | 1  |         | 0.1849            |

† Significant effects ( $p < 0.05$ ) are in bold.

*Note:* For this model species and soil type were considered as fixed factors.

**Table S4.** ANOVA for soil pH at 87 days after planting.

| Treatment effect                          | DF | F Value | Pr > F†           |
|-------------------------------------------|----|---------|-------------------|
| Species                                   | 2  | 28.25   | <b>&lt;0.0001</b> |
| Soil type                                 | 3  | 65.05   | <b>&lt;0.0001</b> |
| Species x Soil type                       | 6  | 2.56    | <b>0.0365</b>     |
| C1: Lupine vs. Oat in Site 1              | 1  |         | <b>0.0372</b>     |
| C1: Lupine vs. Oat in Site 2              | 1  |         | <b>0.0005</b>     |
| C1: Lupine vs. Oat in Site 3              |    |         | <b>&lt;.0001</b>  |
| C1: Lupine vs. Oat in Site 4              | 1  |         | <b>0.0001</b>     |
| C2: L. albus vs L.angustifolius in Site 1 | 1  |         | 0.9322            |
| C2: L. albus vs L.angustifolius in Site 2 | 1  |         | 0.8250            |
| C2: L. albus vs L.angustifolius in Site 3 | 1  |         | <b>0.0017</b>     |
| C2: L. albus vs L.angustifolius in Site 4 | 1  |         | 0.2385            |

† Significant effects ( $p < 0.05$ ) are in bold.

*Note:* For this model species and soil type were considered as fixed factors.

**Table S5.** Orthogonal contrasts for biomass measurements.

| Constrast Label                             | Aboveg.<br>biomass | Plant P<br>conc. | Plant P<br>content | Plant N<br>conc. | Plant N<br>content |
|---------------------------------------------|--------------------|------------------|--------------------|------------------|--------------------|
| C1: Oat vs lupine in Site 1                 | <b>0.0058</b>      | 0.2001           | <b>0.0201</b>      | <b>&lt;.0001</b> | <b>&lt;.0001</b>   |
| C1: Oat vs lupine in Site 2                 | <b>&lt;.0001</b>   | <b>&lt;.0001</b> | <b>&lt;.0001</b>   | <b>&lt;.0001</b> | <b>0.0173</b>      |
| C1: Oat vs lupine in Site 3                 | 0.1525             | 0.6802           | 0.1277             | <b>&lt;.0001</b> | <b>&lt;.0001</b>   |
| C1: Oat vs lupine in Site 4                 | <b>0.0005</b>      | <b>0.0399</b>    | 0.3391             | <b>&lt;.0001</b> | 0.9579             |
| C2:L.albus vs L.<br>angustifolius in Site 1 | <b>0.0046</b>      | 0.4438           | <b>0.0040</b>      | 0.0853           | <b>&lt;.0001</b>   |
| C2:L.albus vs L.<br>angustifolius in Site 2 | <b>0.0032</b>      | 0.7289           | <b>0.0002</b>      | <b>0.0002</b>    | <b>&lt;.0001</b>   |
| C2:L.albus vs L.<br>angustifolius in Site 3 | <b>0.0009</b>      | <b>0.0008</b>    | <b>0.0354</b>      | 0.7395           | <b>&lt;.0001</b>   |
| C2:L.albus vs L.<br>angustifolius in Site 4 | <b>0.0491</b>      | 0.0876           | 0.0906             | 0.336            | <b>0.0394</b>      |

Significant effects ( $p < 0.05$ ) are in bold.

**Table S6.** Mean values of BNF proportion (Ndfa) and N fixed content of lupines as affected by species and soil type.

| Species                                                                                                                                                                                         | Ndfa    |    | N fixed content      |   |
|-------------------------------------------------------------------------------------------------------------------------------------------------------------------------------------------------|---------|----|----------------------|---|
|                                                                                                                                                                                                 | %       |    | mg pot <sup>-1</sup> |   |
| Lupinus albus                                                                                                                                                                                   | 66.2    | ns | 237.4                | a |
| Lupinus angustifolius                                                                                                                                                                           | 60.3    | ns | 105.3                | b |
| Site (Soil type)                                                                                                                                                                                |         |    |                      |   |
| Site 1 (Pachic Argiudoll)                                                                                                                                                                       | 71.7    | b  | 197.0                | a |
| Site 2 (Typic Dystrutepts)                                                                                                                                                                      | 59.4    | c  | 187.9                | a |
| Site 3 (Typic Argiudoll)                                                                                                                                                                        | 82.5    | a  | 244.7                | a |
| Site 4 (Typic Hapludults)                                                                                                                                                                       | 39.3    | d  | 55.9                 | b |
| Significance of treatment effect                                                                                                                                                                |         |    |                      |   |
| Species                                                                                                                                                                                         | <0.1206 |    | <.0001               |   |
| Soil type                                                                                                                                                                                       | <0.0001 |    | 0.0011               |   |
| Species*soil type                                                                                                                                                                               | <0.0644 |    | 0.8933               |   |
| Significant effects (p < 0.05) are in bold. Different lowercase letters within a column indicate differences between species or sites, at p-level of 0.05. ns: means no significant difference. |         |    |                      |   |

**Table S7.** Pearson correlation coefficients (r) within each species across four soils types.

| Variables             |                        | L. albus |     | L. angustifolius |     | A. strigosa |     |
|-----------------------|------------------------|----------|-----|------------------|-----|-------------|-----|
| $\Delta$ pH- initial  | Shoot dry weight       | -0.61    | *   | -0.75            | *   | -0.71       | **  |
| $\Delta$ pH- initial  | Plant N content        | -0.72    | *** | -0.71            | *   | -0.42       |     |
| $\Delta$ pH- initial  | Plant P content        | -0.75    | **  | -0.71            | *   | -0.91       | *** |
| pH_87 dap             | Plant Mn concentration | 0.66     | **  | -0.76            | *   | -0.06       |     |
| pH_48 dap             | Plant Mn concentration | 0.52     | *   | -0.77            | **  | -0.36       |     |
| PBray1-48dap          | Plant Mn concentration | -0.21    |     | 0.30             |     | -0.58       | *   |
| PBray1-48dap          | Plant P concentration  | 0.56     | *   | 0.16             |     | 0.63        | *   |
| PBray1-48dap          | $\Delta$ pH- initial   | -0.51    | *   | -0.12            |     | -0.86       | *** |
| PBray1-48dap          | Plant N content        | 0.60     | *   | 0.16             |     | 0.34        |     |
| PBray1-48dap          | Plant P content        | 0.80     | **  | 0.22             |     | 0.87        | *** |
| PBray1-48dap          | Shoot dry weight       | 0.51     | *   | 0.31             |     | -0.57       | *   |
| Plant P concentration | Plant Mn concentration | -0.26    |     | 0.13             |     | -0.59       | *   |
| Plant N content       | Plant P content        | 0.94     | *** | 0.93             | *** | 0.65        | **  |

Significant at \*p &lt;0.05; \*\*p &lt;0.01; \*\*\*p &lt;0.001.

**Table S8.** Pearson correlation coefficients (r) within each species across three soils types (excluding Site 4).

| Variables             |                        | L. albus | L. angustifolius | A. strigosa |     |
|-----------------------|------------------------|----------|------------------|-------------|-----|
| ΔpH- initial          | Shoot dry weight       | -0.18    | -0.51            | -0.88       | *** |
| ΔpH- initial          | Plant N content        | -0.49    | -0.40            | -0.69       | *   |
| ΔpH- initial          | Plant P content        | -0.56    | -0.40            | -0.86       | *** |
| pH_48 dap             | Plant Mn concentration | 0.68 *   | -0.85 **         | -0.10       |     |
| PBray1-48dap          | Plant Mn concentration | -0.63 *  | 0.27             | -0.05       |     |
| PBray1-48dap          | Plant P concentration  | 0.07     | -0.35            | -0.33       |     |
| PBray1-48dap          | ΔpH- initial           | -0.09    | 0.38             | -0.55       |     |
| PBray1-48dap          | Plant N content        | -0.05    | -0.22            | 0.62 *      |     |
| PBray1-48dap          | Plant P content        | -0.00    | -0.16            | 0.73 **     |     |
| PBray1-48dap          | Shoot dry weight       | -0.07    | -0.02            | 0.63 *      |     |
| Plant P concentration | Plant Mn concentration | -0.50    | 0.03             | -0.17       |     |
| Plant N content       | Plant P content        | 0.83 *** | 0.92 ***         | 0.87 ***    |     |

Significant at \*p <0.05; \*\*p <0.01; \*\*\*p <0.001.
